# Supplementary material for: Опыт совершенствования подготовки должностных лиц, специалистов го и РСЧС Нижегородской области
Source: MDPI journal article supplement (doi:10.3390/foods11223593), 2007-01-01
Supplement: s1 [file s1]

(A) Scanning electron micrographs (SEM) of *Bacillus marcorestrictum* YC-1. The left image shows a cluster of rod-shaped bacteria, and the right image shows individual rod-shaped bacteria. Scale bars represent 10  $\mu\text{m}$ .

(B) Phylogenetic tree showing the relationship between *Bacillus marcorestrictum* YC-1 (marked with a red star) and other *Bacillus* species. The tree is rooted with *Staphylococcus aureus* strain NR 115606.1. Bootstrap values are shown at the nodes. The scale bar represents 0.01 substitutions per site.

(C) Two petri dishes showing the growth of *Bacillus marcorestrictum* YC-1 on agar. The left dish shows a confluent layer of growth, and the right dish shows a confluent layer of growth with a streaked pattern.

1

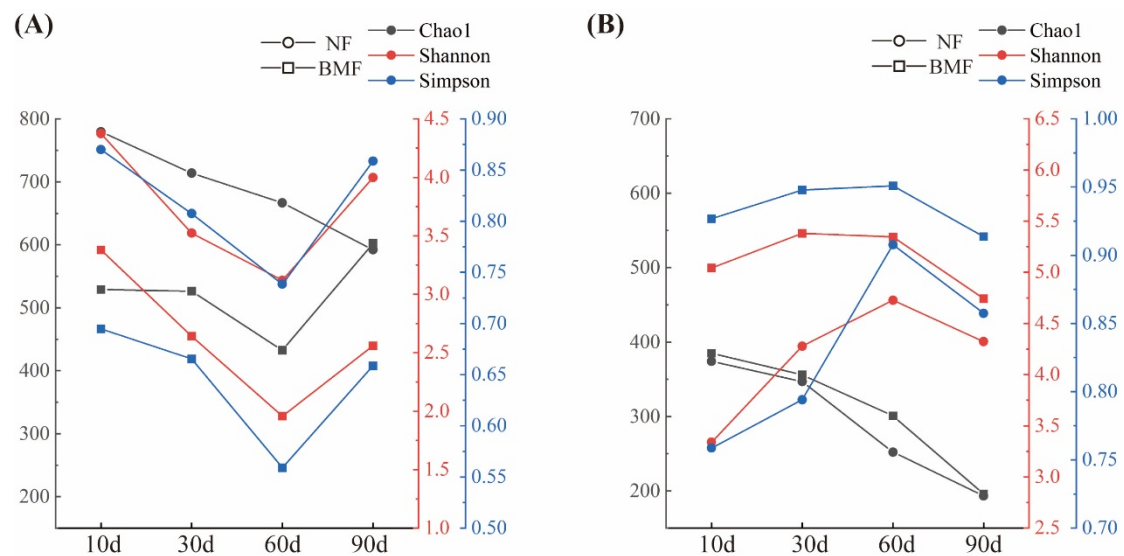

Figure S2: The  $\alpha$ -diversity analysis of microbial communities in NF and BMF on days 10, 30, 60, 90 of fermentation. (A) Bacteria. (B) Fungi.

(A)

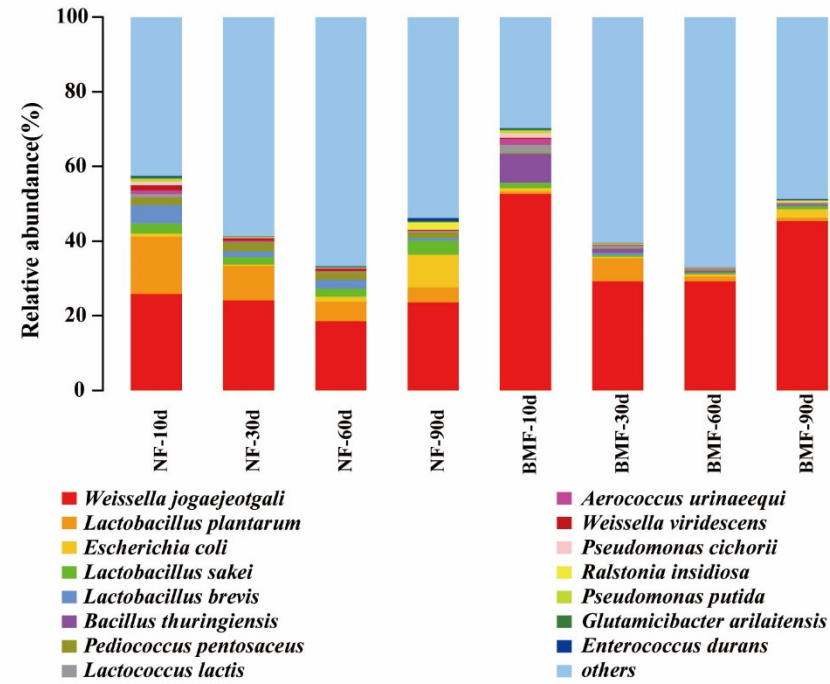

(B)

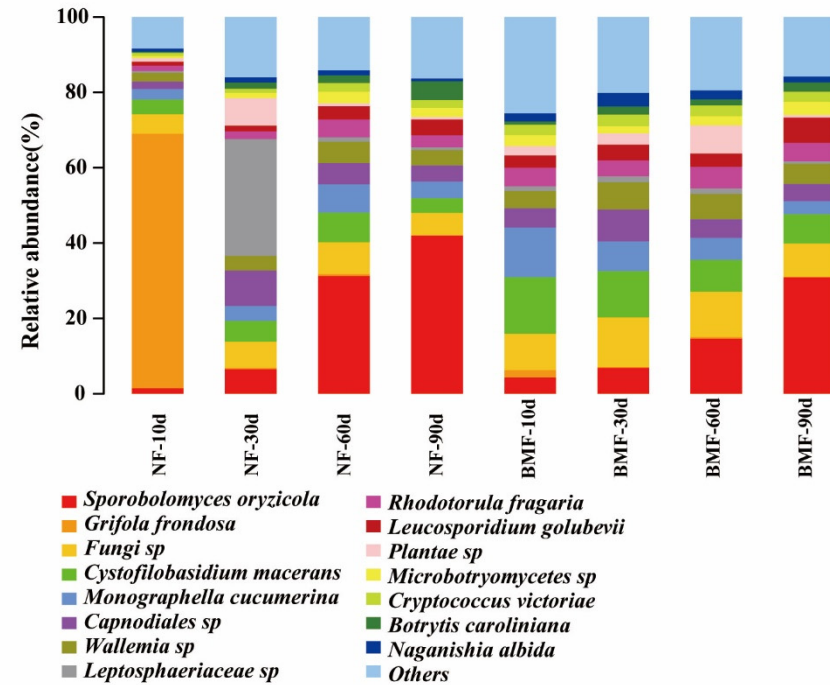

Figure S3: The microbial communities' composition at species level in NF and BMF on days 10, 30, 60, 90 of fermentation. (A) Bacteria. (B) Fungi.

Table S1. Physiological and biochemical identification results

| Substrate             | Reaction |
|-----------------------|----------|
| Peptone               | N        |
| Sucrose               | N        |
| Nitrate               | P        |
| Cellobiose            | N        |
| Glucose (aerogenesis) | P        |
| Glucose               | P        |
| Galactose             | N        |
| Arabinose             | N        |
| Glycerin              | N        |
| Hydrogen sulfide      | N        |
| Melezitose            | N        |
| Rhamnose              | N        |

P means positive, and N means negative

Table S2. The results of susceptibility test

|     | <b>Antibiotics</b> | <b>Sensitivity</b> |
|-----|--------------------|--------------------|
| E   | Erythromycin       | I                  |
| CC  | Clindamycin        | S                  |
| IPM | imipenem           | S                  |
| CIP | Ciprofloxacin      | S                  |
| C   | Chloramphenicol    | S                  |
| GM  | Gentamicin         | S                  |
| VA  | Vancomycin         | S                  |
| TE  | Tetracycline       | S                  |

I means intermediary, and S means sensitive.

Table S3. The contents of OAs in NF and BMF during fermentation

| OAs           | The contents of OAs (mg/g) |                |               |                 |               |                 |              |                 |
|---------------|----------------------------|----------------|---------------|-----------------|---------------|-----------------|--------------|-----------------|
|               | NF-10D                     | BMF-10D        | NF-30D        | BMF-30D         | NF-60D        | BMF-60D         | NF-90D       | BMF-90D         |
| Oxalic acid   | 6.39 ± 0.08                | 12.22 ± 0.28 * | 17.96 ± 0.17  | 18.02 ± 0.11    | 17.88 ± 0.41  | 17.24 ± 0.18    | 8.73 ± 0.18  | 13.35 ± 0.12 *  |
| Tartaric acid | 0.70 ± 0.29                | 0.54 ± 0.00    | 1.02 ± 0.66   | 0.93 ± 0.37     | 2.91 ± 0.67   | 1.79 ± 0.21     | 2.95 ± 0.09  | 2.02 ± 0.21 *   |
| Malic acid    | 53.66 ± 1.11               | 95.91 ± 3.41 * | 145.15 ± 2.08 | 154.91 ± 2.38 * | 136.61 ± 1.90 | 153.43 ± 1.55 * | 70.93 ± 0.58 | 112.20 ± 0.56 * |
| Lactic acid   | 1.74 ± 0.50                | 1.24 ± 0.27    | 14.47 ± 2.08  | 10.67 ± 0.43 *  | 2.68 ± 0.57   | 3.57 ± 0.73     | 7.05 ± 0.61  | 8.46 ± 0.67 *   |
| Acetic acid   | 0.57 ± 0.43                | 0.50 ± 0.35    | 3.26 ± 0.83   | 1.86 ± 0.09 *   | 3.26 ± 0.89   | 0.64 ± 0.03 *   | 1.68 ± 0.30  | 2.18 ± 0.39     |
| Citric acid   | 1.46 ± 0.04                | 2.67 ± 0.64 *  | 2.04 ± 0.43   | 1.25 ± 0.22 *   | 1.79 ± 0.07   | 1.91 ± 0.80     | 1.05 ± 0.10  | 1.16 ± 0.02     |
| Succinic acid | 0.87 ± 0.02                | 3.74 ± 0.69 *  | 5.29 ± 0.69   | 5.92 ± 0.40     | 6.26 ± 0.34   | 4.22 ± 0.11 *   | 3.16 ± 0.53  | 6.03 ± 1.88     |
| In total      | 65.40                      | 116.82         | 189.18        | 193.57          | 171.38        | 182.80          | 95.55        | 145.39          |

Data are shown as means ± standard deviation (n = 3).

Means with \* within a column are significantly different compared with NF ( $p < 0.05$ ).

Table S4. The contents of FAAs in NF and BMF during fermentation

| FAAs                 | The contents of FAAs (mg/100g) |                |              |                |              |                |              |                |
|----------------------|--------------------------------|----------------|--------------|----------------|--------------|----------------|--------------|----------------|
|                      | NF-10D                         | BMF-10D        | NF-30D       | BMF-30D        | NF-60D       | BMF-60D        | NF-90D       | BMF-90D        |
| Sweet amino acids    |                                |                |              |                |              |                |              |                |
| Thr                  | 4.54 ± 0.53                    | 6.33 ± 0.04 *  | 4.11 ± 0.05  | 5.29 ± 0.14 *  | 4.82 ± 0.06  | 6.14 ± 0.10 *  | 2.87 ± 0.03  | 3.93 ± 0.08 *  |
| Ser                  | 4.02 ± 0.16                    | 5.36 ± 0.04 *  | 3.25 ± 0.02  | 4.16 ± 0.22 *  | 3.66 ± 0.06  | 4.80 ± 0.07 *  | 2.15 ± 0.02  | 2.95 ± 0.09 *  |
| Gly                  | 3.24 ± 0.24                    | 3.86 ± 0.25 *  | 3.60 ± 1.52  | 3.23 ± 0.38    | 3.59 ± 0.32  | 4.50 ± 0.22 *  | 1.38 ± 0.04  | 2.02 ± 0.07 *  |
| Ala                  | 16.50 ± 0.24                   | 21.17 ± 0.49 * | 12.60 ± 0.00 | 16.57 ± 0.61 * | 16.16 ± 0.43 | 22.01 ± 0.29 * | 7.52 ± 0.06  | 11.52 ± 0.33 * |
| Lys                  | 4.98 ± 0.06                    | 6.36 ± 0.27 *  | 4.05 ± 0.04  | 5.32 ± 0.12    | 4.94 ± 0.21  | 6.00 ± 0.14 *  | 2.46 ± 0.07  | 3.64 ± 0.06 *  |
| Pro                  | 11.22 ± 0.15                   | 16.98 ± 0.35 * | 10.04 ± 0.13 | 12.49 ± 0.52 * | 12.03 ± 0.67 | 15.45 ± 0.30 * | 7.49 ± 0.02  | 9.42 ± 0.22 *  |
| In total             | 44.51                          | 60.07          | 37.65        | 47.07          | 45.20        | 58.90          | 23.88        | 33.48          |
| Umami amino acids    |                                |                |              |                |              |                |              |                |
| Asp                  | 26.34 ± 0.23                   | 32.25 ± 0.27 * | 19.59 ± 0.24 | 24.87 ± 0.35 * | 24.65 ± 0.51 | 28.43 ± 0.14 * | 13.41 ± 0.03 | 16.99 ± 0.38 * |
| Glu                  | 12.84 ± 0.27                   | 25.03 ± 5.50 * | 10.43 ± 5.04 | 12.09 ± 1.41   | 2.62 ± 0.44  | 6.11 ± 0.30 *  | 8.62 ± 0.04  | 10.80 ± 0.24 * |
| In total             | 39.18                          | 57.28          | 30.02        | 36.96          | 27.27        | 34.55          | 22.03        | 27.80          |
| Bitter amino acids   |                                |                |              |                |              |                |              |                |
| Val                  | 8.21 ± 0.20                    | 9.86 ± 0.34 *  | 6.65 ± 0.08  | 8.27 ± 0.24 *  | 6.06 ± 1.06  | 8.98 ± 0.30 *  | 2.40 ± 0.30  | 3.24 ± 0.14 *  |
| Met                  | 0.26 ± 0.03                    | 0.30 ± 0.01 *  | 4.11 ± 0.31  | 0.28 ± 0.19 *  | 5.23 ± 0.03  | 0.91 ± 0.10 *  | 3.27 ± 0.19  | 0.69 ± 0.06 *  |
| Ile                  | 4.65 ± 0.01                    | 6.08 ± 0.14 *  | 3.32 ± 0.13  | 4.47 ± 0.05 *  | 4.11 ± 0.10  | 5.27 ± 0.06 *  | 2.00 ± 0.01  | 2.89 ± 0.10 *  |
| Leu                  | 7.14 ± 0.01                    | 8.86 ± 0.26 *  | 5.61 ± 0.05  | 6.65 ± 0.06 *  | 6.72 ± 0.07  | 8.00 ± 0.11 *  | 3.32 ± 0.03  | 4.44 ± 0.19 *  |
| Tyr                  | 2.35 ± 0.10                    | 3.01 ± 0.05 *  | 1.99 ± 0.03  | 2.67 ± 0.09 *  | 2.29 ± 0.02  | 3.02 ± 0.02 *  | 1.39 ± 0.49  | 1.71 ± 0.04    |
| Phe                  | 3.98 ± 0.05                    | 5.18 ± 0.13 *  | 2.64 ± 0.02  | 3.20 ± 0.08 *  | 3.05 ± 0.05  | 3.59 ± 0.04 *  | 1.46 ± 0.03  | 1.93 ± 0.15 *  |
| His                  | 2.98 ± 0.05                    | 3.97 ± 0.08 *  | 2.49 ± 0.06  | 3.17 ± 0.03 *  | 2.88 ± 0.06  | 3.52 ± 0.10 *  | 1.29 ± 0.03  | 1.94 ± 0.05 *  |
| Arg                  | 8.98 ± 0.11                    | 12.40 ± 0.05 * | 2.65 ± 0.12  | 9.92 ± 0.47 *  | 1.59 ± 0.11  | 11.02 ± 0.22 * | 1.24 ± 0.04  | 6.60 ± 0.06 *  |
| In total             | 38.54                          | 49.66          | 29.46        | 38.62          | 31.93        | 44.31          | 16.36        | 23.44          |
| Odorless amino acids |                                |                |              |                |              |                |              |                |
| Cys                  | 0.21 ± 0.02                    | 0.23 ± 0.04 *  | 2.41 ± 0.63  | 0.34 ± 0.05 *  | 0.65 ± 0.28  | 0.37 ± 0.02    | -            | -              |
| In total             | 122.44                         | 167.24         | 99.54        | 122.99         | 105.05       | 138.13         | 62.27        | 84.72          |

Data are shown as means ± standard deviation (n = 3).

Means with \* within a column are significantly different compared with NF ( $p < 0.05$ ).

Table S5 Detailed information and contents of main VCs in NF

| Number   | Compounds                                   | CAS        | RI   | The contents of VCs in NF (µg/100g) |               |                  |                  |
|----------|---------------------------------------------|------------|------|-------------------------------------|---------------|------------------|------------------|
|          |                                             |            |      | 10D                                 | 30D           | 60D              | 90D              |
| Acids    |                                             |            |      |                                     |               |                  |                  |
| 1        | 4-Propylbenzoic acid                        | 2438-05-3  | 1462 | ND                                  | ND            | ND               | 279.39 ± 33.22   |
| 2        | Hexadecanoic acid                           | 57-10-3    | 1968 | ND                                  | ND            | ND               | 150.61 ± 0.15    |
| 3        | Acetic acid                                 | 64-19-7    | 576  | 118.58 ± 29.63                      | 96.33 ± 47.53 | 2284.17 ± 416.32 | 1756.49 ± 457.75 |
| 4        | p-tert-Butylbenzoic acid                    | 98-73-7    | 1477 | ND                                  | ND            | 123.53 ± 12.94   | 193.31 ± 14.38   |
| Alcohols |                                             |            |      |                                     |               |                  |                  |
| 5        | trans-Farnesol                              | 106-28-5   | 1710 | ND                                  | ND            | 55.49 ± 8.87     | ND               |
| 6        | D-Nerolidol                                 | 142-50-7   | 1564 | 23.14 ± 0.71                        | ND            | 193.63 ± 33.45   | ND               |
| 7        | cis-4-Thujanol                              | 15537-55-0 | 1041 | ND                                  | ND            | ND               | 222.69 ± 15.82   |
| 8        | α-muurolol                                  | 19435-97-3 | 1580 | ND                                  | ND            | 39.93 ± 1.33     | ND               |
| 9        | (2Z,6Z)-2,6-Dimethyl-2,6-octadiene-1,8-diol | 26489-17-8 | 1471 | ND                                  | ND            | ND               | 177.91 ± 9.20    |
| 10       | (Z)-9-Tetradecen-1-ol                       | 35153-15-2 | 1664 | ND                                  | 7.52 ± 1.52   | 74.70 ± 7.75     | 57.97 ± 9.32     |
| 11       | (Z,E)-Farnesol                              | 3790-71-4  | 1710 | ND                                  | ND            | 2810.94 ± 411.65 | 2839.06 ± 185.10 |
| 12       | Carotol                                     | 465-28-1   | 1593 | ND                                  | ND            | 359.91 ± 117.50  | ND               |
| 13       | α-Bisabolol                                 | 515-69-5   | 1625 | ND                                  | 14.00 ± 3.63  | ND               | ND               |
| 14       | Myrcenol                                    | 543-39-5   | 1064 | ND                                  | 3.73 ± 0.03   | 100.92 ± 7.74    | ND               |
| 15       | 3-Tetradecyn-1-ol                           | 55182-74-6 | 1673 | ND                                  | 137.07 ± 5.06 | ND               | ND               |
| 16       | Viridiflorol                                | 552-02-3   | 1530 | ND                                  | 0.99 ± 0.20   | ND               | ND               |
| 17       | Ocimenol                                    | 5986-38-9  | 1082 | ND                                  | ND            | 86.09 ± 3.81     | ND               |
| 18       | Linalool oxide                              | 5989-33-3  | 1164 | ND                                  | ND            | 33.93 ± 2.88     | ND               |
| 19       | (E)-β-Terpineol                             | 7299-40-3  | 1158 | ND                                  | 85.32 ± 22.58 | 2079.20 ± 254.75 | ND               |



|                     |                                   |            |      |                |                |                  |                   |
|---------------------|-----------------------------------|------------|------|----------------|----------------|------------------|-------------------|
| 20                  | Linalool                          | 78-70-6    | 1082 | 158.20 ± 26.66 | 169.08 ± 45.76 | 3615.89 ± 415.19 | 2046.01 ± 230.32  |
| <b>Aldehydes</b>    |                                   |            |      |                |                |                  |                   |
| 21                  | (E,E)-2,4-Hexadienal              | 142-83-6   | 822  | 3.3 ± 0.20     | ND             | ND               | ND                |
| 22                  | (E,E)-2,4-Heptadienal             | 4313-03-5  | 921  | ND             | ND             | 49.20 ± 10.65    | ND                |
| 23                  | Benzaldehyde                      | 100-52-7   | 982  | ND             | 2.90 ± 1.87    | 144.96 ± 33.51   | 67.74 ± 8.76      |
| 24                  | Benzenepropanal                   | 104-53-0   | 1181 | ND             | ND             | 17.51 ± 3.05     | ND                |
| 25                  | Anisaldehyde                      | 123-11-5   | 1171 | 79.55 ± 24.17  | 33.13 ± 7.18   | 1334.49 ± 137.52 | 4295.39 ± 1478.80 |
| 26                  | Tetradecanal                      | 124-25-4   | 1601 | ND             | 0.67 ± 0.10    | 13.66 ± 1.71     | 25.55 ± 3.23      |
| 27                  | 2-Methoxy cinnamaldehyde          | 1504-74-1  | 1378 | ND             | ND             | ND               | 309.65 ± 55.37    |
| 28                  | α-Sinensal                        | 17909-77-2 | 1646 | ND             | ND             | 60.84 ± 7.19     | 33.80 ± 5.73      |
| 29                  | Methyl coniferyl aldehyde         | 4497-40-9  | 1567 | ND             | ND             | ND               | 22.51 ± 1.66      |
| 30                  | (E)-2-Undecenal                   | 53448-07-0 | 1311 | ND             | ND             | ND               | 30.19 ± 14.15     |
| 31                  | 2-Hydroxy-4-methoxybenzaldehyde   | 673-22-3   | 1392 | ND             | 1.97 ± 0.11    | 91.33 ± 7.52     | ND                |
| <b>Heterocycles</b> |                                   |            |      |                |                |                  |                   |
| 32                  | Durenol                           | 527-35-5   | 1354 | ND             | 1.16 ± 0.13    | 52.29 ± 0.82     | ND                |
| 33                  | 1-(2-Methoxyphenyl)-2-nitroethene | 3316-24-3  | 1472 | ND             | ND             | 171.94 ± 6.20    | 185.03 ± 139.02   |
| 34                  | 1,2-Epoxyhexadecane               | 7320-37-8  | 1702 | ND             | ND             | ND               | 26.74 ± 3.50      |
| 35                  | N-Methyl-1-naphthylamine          | 2216-68-4  | 1543 | ND             | ND             | 91.74 ± 25.37    | 137.61 ± 15.15    |
| 36                  | 4-Acetoxy-1-decene                | 2833-33-2  | 1307 | ND             | 0.76 ± 0.14    | ND               | ND                |
| 37                  | 2-Methoxy-diphenylmethane         | 883-90-9   | 1656 | ND             | ND             | ND               | 110.24 ± 0.45     |
| <b>Ethers</b>       |                                   |            |      |                |                |                  |                   |
| 38                  | Anethole                          | 104-46-1   | 1190 | 112.32 ± 18.77 | 160.18 ± 22.84 | 3939.68 ± 418.30 | 3611.62 ± 452.71  |

|                |                                 |            |      |                |                |                  |                   |
|----------------|---------------------------------|------------|------|----------------|----------------|------------------|-------------------|
| 39             | Nerol oxide                     | 1786-08-9  | 1125 | ND             | ND             | 27.82 ± 0.69     | 54.10 ± 16.13     |
| 40             | 1,4-Cineol                      | 470-67-7   | 1012 | ND             | 35.04 ± 2.70   | ND               | ND                |
| <b>Esters</b>  |                                 |            |      |                |                |                  |                   |
| 41             | β-Terpinylacetate               | 10198-23-9 | 1348 | ND             | 28.04 ± 3.21   | 421.70 ± 2.90    | 512.02 ± 234.84   |
| 42             | Cinnamyl acetate                | 103-54-8   | 1367 | 4.48 ± 0.75    | ND             | ND               | ND                |
| 43             | Cinnamyl propionate             | 103-56-0   | 1466 | ND             | 15.24 ± 0.96   | 538.48 ± 64.60   | 920.54 ± 85.88    |
| 44             | Hexadecanoic acid, methyl ester | 112-39-0   | 1878 | ND             | ND             | ND               | 38.53 ± 7.84      |
| 45             | Linalyl formate                 | 115-99-1   | 1270 | 491.13 ± 31.34 | 348.98 ± 1.19  | 3223.89 ± 291.55 | 2525.13 ± 453.62  |
| 46             | Benzenepropyl acetate           | 122-72-5   | 1359 | ND             | 6.59 ± 0.22    | 188.56 ± 12.39   | 256.07 ± 40.49    |
| 47             | Nerol acetate                   | 141-12-8   | 1352 | 7.01 ± 0.27    | 11.11 ± 0.75   | 231.54 ± 36.22   | 145.64 ± 34.77    |
| 48             | Ethyl p-methoxycinnamate        | 1929-30-2  | 1556 | 221.04 ± 74.98 | 194.77 ± 13.96 | 2503.88 ± 406.61 | 11429.58 ± 110.43 |
| 49             | Methyl 3-methoxybenzoate        | 5368-81-0  | 1249 | ND             | ND             | ND               | 241.43 ± 20.93    |
| 50             | Decyl chloroformate             | 55488-51-2 | 1458 | ND             | ND             | 12.29 ± 1.01     | ND                |
| 51             | Cyclotene butyrate              | 68227-51-0 | 1398 | ND             | 4.32 ± 2.22    | ND               | ND                |
| 52             | n-Propyl cinnamate              | 7778-83-8  | 1466 | ND             | 209.34 ± 8.71  | 5040.15 ± 463.11 | 8239.09 ± 1457.51 |
| 53             | α-Terpinyl acetate              | 80-26-2    | 1333 | 40.05 ± 1.96   | 1.04 ± 0.11    | ND               | 34.07 ± 12.63     |
| 54             | Coumarin                        | 91-64-5    | 1374 | ND             | ND             | ND               | 126.43 ± 49.26    |
| 55             | Eugenol acetate                 | 93-28-7    | 1552 | ND             | ND             | 6.99 ± 4.51      | ND                |
| <b>Ketones</b> |                                 |            |      |                |                |                  |                   |
| 56             | 4-Acetylanisole                 | 100-06-1   | 1218 | ND             | 8.02 ± 1.62    | ND               | 123.56 ± 54.88    |
| 57             | p-Acetonylanisole               | 122-84-9   | 1318 | ND             | ND             | 156.50 ± 25.10   | 255.67 ± 78.82    |
| 58             | Dihydro-β-ionone                | 17283-81-7 | 1449 | ND             | 1.88 ± 0.38    | ND               | ND                |
| 59             | 2-Pentadecanone                 | 2345-28-0  | 1648 | ND             | ND             | 5.56 ± 3.01      | 11.01 ± 2.82      |

|                   |                                |            |      |                |                |                  |                  |
|-------------------|--------------------------------|------------|------|----------------|----------------|------------------|------------------|
| 60                | 2-Bromo-3'-methoxyacetophenone | 5000-65-7  | 1514 | ND             | 0.63 ± 0.28    | 46.45 ± 5.01     | 48.74 ± 0.39     |
| 61                | Eucarvone                      | 503-93-5   | 1199 | ND             | ND             | 14.94 ± 0.55     | ND               |
| <b>Terpenoids</b> |                                |            |      |                |                |                  |                  |
| 62                | Valencene                      | 4630-07-3  | 1474 | 76.27 ± 7.81   | 47.95 ± 3.06   | ND               | 272.66 ± 8.80    |
| 63                | α-Muurolen                     | 10208-80-7 | 1440 | 594.12 ± 31.75 | 310.67 ± 15.14 | 29.00 ± 7.05     | 1385.98 ± 128.80 |
| 64                | Cedrene                        | 11028-42-5 | 1398 | ND             | 18.69 ± 1.42   | 241.45 ± 31.69   | 115.85 ± 7.01    |
| 65                | Isocaryophyllene               | 118-65-0   | 1494 | ND             | 2.96 ± 0.17    | ND               | ND               |
| 66                | Isosafrole                     | 120-58-1   | 1668 | ND             | 1.54 ± 0.12    | 42.67 ± 2.12     | 56.34 ± 5.66     |
| 67                | β-Myrcene                      | 123-35-3   | 958  | 18.01 ± 0.38   | 8.92 ± 2.76    | 432.82 ± 45.09   | 247.80 ± 18.06   |
| 68                | (E)-α-Bergamotene              | 13474-59-4 | 1430 | ND             | 24.11 ± 0.17   | 305.36 ± 50.09   | 174.84 ± 0.33    |
| 69                | β-Ocimene                      | 13877-91-3 | 976  | 9.05 ± 0.20    | 10.53 ± 1.99   | 223.22 ± 2.54    | 146.94 ± 29.37   |
| 70                | α-Bergamotene                  | 17699-05-7 | 1430 | 135.99 ± 12.82 | ND             | ND               | ND               |
| 71                | α-Cubebene                     | 17699-14-8 | 1344 | 414.02 ± 55.46 | 246.42 ± 44.26 | 2762.87 ± 421.72 | 903.29 ± 160.42  |
| 72                | (E)-β-Farnesene                | 18794-84-8 | 1440 | 55.12 ± 2.64   | ND             | 73.25 ± 11.74    | 114.23 ± 6.05    |
| 73                | Humulene epoxide II            | 19888-34-7 | 1592 | ND             | ND             | 15.86 ± 4.51     | ND               |
| 74                | β-Sesquiphellandrene           | 20307-83-9 | 1446 | ND             | 31.23 ± 3.85   | 201.82 ± 8.57    | ND               |
| 75                | α-Calacorene                   | 21391-99-1 | 1547 | 12.83 ± 2.39   | 8.59 ± 2.15    | 20.41 ± 3.70     | 129.56 ± 20.95   |
| 76                | Germacrene D                   | 23986-74-5 | 1515 | 244.66 ± 2.65  | 144.85 ± 12.91 | 223.22 ± 4.40    | 731.65 ± 117.48  |
| 77                | α-Bisabolene                   | 29837-07-8 | 1518 | ND             | ND             | ND               | 31.48 ± 11.18    |
| 78                | β-elemene                      | 33880-83-0 | 1398 | ND             | 9.69 ± 1.02    | 91.38 ± 5.49     | 58.91 ± 6.70     |
| 79                | (+)-Sativene                   | 3650-28-0  | 1339 | ND             | 11.72 ± 9.37   | 13.00 ± 2.12     | ND               |
| 80                | α-Bulnesene                    | 3691-11-0  | 1490 | ND             | ND             | 60.00 ± 11.20    | 63.04 ± 11.32    |
| 81                | Fenchene                       | 471-84-1   | 943  | ND             | ND             | 112.10 ± 1.83    | ND               |
| 82                | α-Selinene                     | 473-13-2   | 985  | ND             | 1.88 ± 0.66    | ND               | ND               |
| 83                | Δ-Cadinene                     | 483-76-1   | 1469 | ND             | ND             | 447.30 ± 27.19   | ND               |

|                     |                           |            |      |                 |                |                    |                 |
|---------------------|---------------------------|------------|------|-----------------|----------------|--------------------|-----------------|
| 84                  | L-calamenene              | 483-77-2   | 1537 | 42.62 ± 2.71    | 46.61 ± 0.54   | 275.90 ± 31.89     | 269.05 ± 16.09  |
| 85                  | Aromandendrene            | 489-39-4   | 1386 | 40.85 ± 6.33    | 46.13 ± 6.89   | 366.49 ± 19.88     | 154.53 ± 6.82   |
| 86                  | β-Bisabolene              | 495-61-4   | 1500 | 25.77 ± 0.86    | 37.90 ± 15.39  | 212.02 ± 19.98     | 320.90 ± 45.11  |
| 87                  | γ-Patchoulene             | 508-55-4   | 1398 | ND              | 15.07 ± 1.39   | ND                 | ND              |
| 88                  | Terpinolene               | 586-62-9   | 1052 | ND              | 0.21 ± 0.02    | 40.52 ± 8.57       | 12.00 ± 1.46    |
| 89                  | D-Limonene                | 5989-27-5  | 1018 | 57.09 ± 5.80    | 13.77 ± 5.88   | 1038.64 ± 100.28   | ND              |
| 90                  | (-)-Aristolene            | 6831-16-9  | 1403 | ND              | 1.94 ± 0.24    | ND                 | ND              |
| 91                  | γ-Terpinene               | 99-85-4    | 998  | 9.41 ± 2.02     | 4.23 ± 0.52    | 83.16 ± 13.03      | ND              |
| <b>Hydrocarbons</b> |                           |            |      |                 |                |                    |                 |
| 92                  | 1-Pentadecene             | 13360-61-7 | 1502 | ND              | 20.36 ± 0.74   | 224.66 ± 17.12     | ND              |
| 93                  | 1,3,8-p-Menthatriene      | 18368-95-1 | 1029 | ND              | 0.88 ± 0.00    | 27.96 ± 2.72       | 7.43 ± 0.87     |
| 95                  | β-Methylisoallylbenzene   | 768-49-0   | 1077 | ND              | ND             | ND                 | 35.07 ± 6.01    |
| 96                  | Hexadecane                | 544-76-3   | 1612 | 5.87 ± 0.74     | 3.45 ± 0.79    | 44.36 ± 12.13      | 63.67 ± 9.90    |
| 97                  | 2-Methyl-6-propyldodecane | 55045-08-4 | 1483 | ND              | ND             | ND                 | 4170.21 ± 59.74 |
| 98                  | Pentadecane               | 629-62-9   | 1512 | 1172.55 ± 58.21 | 807.37 ± 74.39 | 12291.40 ± 1507.37 | ND              |
| 99                  | Heptadecane               | 629-78-7   | 1711 | 40.86 ± 3.79    | 24.00 ± 7.11   | 265.41 ± 41.80     | 316.39 ± 16.54  |
| 100                 | 8-Hexadecyne              | 19781-86-3 | 1629 | 12.65 ± 0.51    | ND             | ND                 | ND              |

Data are shown as means ± standard deviation (n = 3).

ND means not detected

Table S6. Detailed information and contents of main VCs in BMF

| Number    | Compounds                | CAS        | RI   | The contents of VCs in BMF (µg/100g) |              |                  |                  |
|-----------|--------------------------|------------|------|--------------------------------------|--------------|------------------|------------------|
|           |                          |            |      | 10D                                  | 30D          | 60D              | 90D              |
| Acids     |                          |            |      | ND                                   | ND           | ND               | ND               |
| 1         | Hexadecanoic acid        | 57-10-3    | 1968 | ND                                   | ND           | ND               | 80.81 ± 9.46     |
| 2         | Acetic acid              | 64-19-7    | 576  | 27.15 ± 5.76                         | 38.24 ± 4.49 | 1101.79 ± 67.37  | 2580.26 ± 432.93 |
| 3         | p-tert-Butylbenzoic acid | 98-73-7    | 1477 | ND                                   | ND           | ND               | 190.95 ± 32.33   |
| Alcohols  |                          |            |      |                                      |              |                  |                  |
| 4         | β-Terpineol              | 138-87-4   | 1158 | ND                                   | 59.36 ± 5.54 | ND               | ND               |
| 5         | D-Nerolidol              | 142-50-7   | 1564 | 8.19 ± 6.10                          | 5.99 ± 1.52  | 167.43 ± 23.62   | ND               |
| 6         | cis-4-Thujanol           | 15537-55-0 | 1041 | ND                                   | 1.45 ± 0.06  | 717.07 ± 248.01  | 414.41 ± 88.30   |
| 7         | Cubenol                  | 21284-22-0 | 1580 | ND                                   | 5.33 ± 0.23  | ND               | ND               |
| 8         | (Z)-9-Tetradecen-1-ol    | 35153-15-2 | 1664 | ND                                   | 4.24 ± 0.32  | 109.08 ± 8.57    | 88.05 ± 15.08    |
| 9         | (Z,E)-Farnesol           | 3790-71-4  | 1710 | ND                                   | 50.01 ± 7.07 | 3617.19 ± 527.25 | 3077.64 ± 823.55 |
| 10        | α-Cadinol                | 481-34-5   | 1580 | ND                                   | ND           | 117.61 ± 9.99    | ND               |
| 11        | α-Bisabolol              | 515-69-5   | 1625 | ND                                   | 6.87 ± 1.12  | 347.34 ± 34.20   | ND               |
| 12        | Myrcenol                 | 543-39-5   | 1064 | ND                                   | 2.65 ± 0.92  | 86.61 ± 1.01     | 76.17 ± 10.82    |
| 13        | Viridiflorol             | 552-02-3   | 1530 | ND                                   | 0.58 ± 0.12  | 38.09 ± 3.01     | ND               |
| 14        | Terpinen-4-ol            | 562-74-3   | 1137 | 61.60 ± 14.58                        | ND           | 1773.93 ± 375.75 | 1502.45 ± 386.08 |
| 15        | γ-Terpineol              | 586-81-2   | 1191 | ND                                   | ND           | ND               | 756.25 ± 212.99  |
| 16        | Ocimenol                 | 5986-38-9  | 1082 | ND                                   | ND           | 74.56 ± 5.36     | ND               |
| 17        | Nerolidol                | 7212-44-4  | 1564 | ND                                   | ND           | 297.89 ± 15.14   | ND               |
| 18        | 2,4-Undecadienol         | 77657-78-4 | 1373 | ND                                   | ND           | 30.18 ± 9.94     | ND               |
| 19        | Linalool                 | 78-70-6    | 1082 | 109.61 ± 16.08                       | 92.59 ± 6.81 | 3269.20 ± 932.74 | 4355.95 ± 585.54 |
| Aldehydes |                          |            |      |                                      |              |                  |                  |

|                     |                                 |            |      |                |               |                   |                  |
|---------------------|---------------------------------|------------|------|----------------|---------------|-------------------|------------------|
| 20                  | (E,E)-2,4-Hexadienal            | 142-83-6   | 822  | 2.15 ± 0.03    | ND            | ND                | ND               |
| 21                  | (E,E)-2,4-Heptadienal           | 4313-03-5  | 921  | ND             | 1.28 ± 0.31   | 34.44 ± 4.09      | 42.29 ± 5.98     |
| 22                  | Benzaldehyde                    | 100-52-7   | 982  | 0.96 ± 0.16    | 0.86 ± 0.06   | 70.72 ± 18.80     | 95.14 ± 20.68    |
| 23                  | Benzenepropanal                 | 104-53-0   | 1181 | 3.25 ± 0.48    | 4.13 ± 1.05   | 56.39 ± 6.83      | 83.76 ± 11.15    |
| 24                  | Neral                           | 106-26-3   | 1174 | ND             | ND            | 12.31 ± 3.32      | ND               |
| 25                  | Anisaldehyde                    | 123-11-5   | 1171 | 19.85 ± 1.97   | 17.49 ± 0.94  | 1180.24 ± 117.02  | 4380.91 ± 156.99 |
| 26                  | Tetradecanal                    | 124-25-4   | 1601 | ND             | 0.23 ± 0.02   | 17.13 ± 0.04      | 25.90 ± 6.83     |
| 27                  | 2-Methoxy cinnamaldehyde        | 1504-74-1  | 1378 | 16.36 ± 1.00   | ND            | 236.57 ± 14.56    | 329.93 ± 33.74   |
| 28                  | α-Sinensal                      | 17909-77-2 | 1646 | ND             | ND            | 27.07 ± 3.20      | ND               |
| 29                  | 2-Hydroxy-4-methoxybenzaldehyde | 673-22-3   | 1392 | ND             | ND            | 66.38 ± 19.32     | 58.34 ± 25.53    |
| 30                  | Furfural                        | 98-01-1    | 831  | ND             | ND            | ND                | 161.78 ± 11.44   |
| <b>Heterocycles</b> |                                 |            |      |                |               |                   |                  |
| 31                  | α-Durenol                       | 4393-05-9  | 1376 | ND             | 1.79 ± 0.26   | ND                | ND               |
| 32                  | Durenol                         | 527-35-5   | 1354 | ND             | ND            | 76.43 ± 4.82      | ND               |
| 33                  | 2-Methoxy-diphenylmethane       | 883-90-9   | 1656 | ND             | ND            | 100.80 ± 8.83     | 115.68 ± 16.95   |
| 34                  | p-Anisoyl chloride              | 100-07-2   | 1295 | ND             | ND            | 76.73 ± 6.66      | ND               |
| 35                  | N-Methyl-1-naphthylamine        | 2216-68-4  | 1543 | ND             | 2.80 ± 1.12   | 111.02 ± 3.11     | 101.33 ± 5.24    |
| <b>Ethers</b>       |                                 |            |      |                |               |                   |                  |
| 36                  | Anethole                        | 104-46-1   | 1190 | 114.30 ± 21.37 | 66.39 ± 2.18  | 3450.49 ± 1240.81 | 2679.23 ± 73.35  |
| 37                  | Nerol oxide                     | 1786-08-9  | 1125 | ND             | ND            | 33.00 ± 3.58      | 72.63 ± 15.05    |
| 38                  | Isoeugenyl methyl ether         | 93-16-3    | 1379 | ND             | ND            | 122.42 ± 8.62     | ND               |
| <b>Esters</b>       |                                 |            |      |                |               |                   |                  |
| 39                  | β-Terpinylacetate               | 10198-23-9 | 1348 | ND             | 15.04- ± 4.52 | 517.95 ± 31.91    | 434.50 ± 18.31   |
| 40                  | Methyl cinnamate                | 103-26-4   | 1267 | 0.99- ± 0.08   | ND            | ND                | ND               |

|                |                                               |             |      |                |                |                  |                   |
|----------------|-----------------------------------------------|-------------|------|----------------|----------------|------------------|-------------------|
| 41             | Ethyl cinnamate                               | 103-36-6    | 1367 | 220.80 ± 15.46 | ND             | ND               | ND                |
| 42             | Cinnamyl acetate                              | 103-54-8    | 1367 | ND             | 3.03 ± 0.53    | 268.11 ± 26.44   | 439.83 ± 85.54    |
| 43             | Crotonic acid, o-formylphenyl ester           | 114636-69-0 | 1569 | ND             | ND             | 159.50 ± 8.25    | 181.20 ± 35.92    |
| 44             | Linalyl formate                               | 115-99-1    | 1270 | 417.96 ± 24.45 | 134.74 ± 15.51 | 3645.34 ± 237.77 | 1934.83 ± 96.40   |
| 45             | Benzenepropyl acetate                         | 122-72-5    | 1359 | ND             | 3.56 ± 0.47    | 151.29 ± 21.66   | 273.40 ± 20.71    |
| 46             | Nerol acetate                                 | 141-12-8    | 1352 | 5.41 ± 0.32    | 4.71 ± 0.83    | 268.66 ± 31.68   | 181.54 ± 49.13    |
| 47             | Ethyl p-methoxycinnamate                      | 1929-30-2   | 1556 | 149.19 ± 34.01 | 89.22 ± 5.15   | 737.38 ± 121.45  | 11477.28 ± 867.84 |
| 48             | Decyl chloroformate                           | 55488-51-2  | 1458 | ND             | 0.63 ± 0.07    | ND               | ND                |
| 49             | Cyclotene butyrate                            | 68227-51-0  | 1398 | ND             | ND             | 43.35 ± 7.18     | ND                |
| 50             | 2,2,4-Trimethyl-1,3-pentanediol diisobutyrate | 6846-50-0   | 1605 | ND             | 0.66 ± 0.10    | ND               | ND                |
| 51             | Methyl 15-methylhexadecanoate                 | 6929-04-0   | 1914 | ND             | ND             | ND               | 32.95 ± 4.65      |
| 52             | Allyl thiocyanate                             | 764-49-8    | 905  | ND             | ND             | 13.67 ± 2.14     | ND                |
| 53             | n-Propyl cinnamate                            | 7778-83-8   | 1466 | ND             | 121.77 ± 28.27 | 5508.86 ± 352.46 | 7202.57 ± 168.63  |
| 54             | α-Terpinyol acetate                           | 80-26-2     | 1333 | 31.51 ± 0.77   | ND             | 24.55 ± 5.41     | 40.07 ± 5.16      |
| 55             | Coumarin                                      | 91-64-5     | 1374 | ND             | ND             | ND               | 118.24 ± 12.08    |
| <b>Ketones</b> |                                               |             |      |                |                |                  |                   |
| 56             | 4-Acetylanisole                               | 100-06-1    | 1218 | ND             | ND             | ND               | 115.79 ± 11.05    |
| 57             | p-Methoxypropiophenone                        | 121-97-1    | 1318 | ND             | 2.84 ± 0.04    | ND               | 150.55 ± 14.13    |
| 58             | p-Acetonylanisole                             | 122-84-9    | 1318 | ND             | 3.76 ± 1.21    | 160.74 ± 19.54   | 225.99 ± 14.57    |
| 59             | 9-Methyl-5-methylene-8-decen-2-one            | 130876-97-0 | 1302 | ND             | 1.15 ± 0.26    | 77.84 ± 18.24    | 137.98 ± 19.69    |
| 60             | 2-Pentadecanone                               | 2345-28-0   | 1648 | ND             | ND             | 9.73 ± 4.01      | ND                |
| 61             | Geranyl acetone                               | 3796-70-1   | 1420 | ND             | ND             | 105.57 ± 42.27   | ND                |

|                   |                                |            |      |                |               |                  |                  |
|-------------------|--------------------------------|------------|------|----------------|---------------|------------------|------------------|
| 62                | 2-Bromo-3'-methoxyacetophenone | 5000-65-7  | 1514 | ND             | ND            | 39.74 ± 7.60     | 264.85 ± 29.21   |
| 63                | Eucarvone                      | 503-93-5   | 1199 | ND             | 2.76 ± 1.00   | 15.93 ± 2.59     | ND               |
| <b>Terpenoids</b> |                                |            |      |                |               |                  |                  |
| 64                | Valencene                      | 4630-07-3  | 1474 | 51.09 ± 9.61   | 15.60 ± 5.02  | ND               | ND               |
| 65                | α-Muurolen                     | 10208-80-7 | 1440 | 320.92 ± 72.04 | 83.40 ± 39.85 | 2961.93 ± 377.73 | 2595.56 ± 348.38 |
| 66                | Cedrene                        | 11028-42-5 | 1398 | ND             | 7.83 ± 0.01   | 209.45 ± 26.10   | 138.90 ± 11.64   |
| 67                | Isosafrole                     | 120-58-1   | 1668 | ND             | 1.11 ± 0.36   | 50.87 ± 5.62     | 66.02 ± 5.42     |
| 68                | β-Myrcene                      | 123-35-3   | 958  | 11.70 ± 1.17   | 6.51 ± 1.25   | 427.87 ± 41.20   | 251.84 ± 80.05   |
| 69                | (E)-α-Bergamotene              | 13474-59-4 | 1430 | 73.13 ± 18.45  | 12.16 ± 0.44  | 279.19 ± 37.04   | 259.55 ± 81.16   |
| 70                | β-Cubebene                     | 13744-15-5 | 1339 | ND             | ND            | 148.28 ± 3.88    | ND               |
| 71                | β-Ocimene                      | 13877-91-3 | 976  | 5.08 ± 0.43    | 4.76 ± 0.64   | 259.81 ± 24.74   | 205.33 ± 78.18   |
| 72                | β-Himachalene                  | 1461-03-6  | 1528 | ND             | 16.54 ± 2.90  | 404.72 ± 68.73   | 413.30 ± 121.87  |
| 73                | α-Bergamotene                  | 17699-05-7 | 1430 | ND             | 22.02 ± 2.67  | 533.46 ± 3.89    | 320.23 ± 34.58   |
| 74                | α-Cubebene                     | 17699-14-8 | 1344 | 294.11 ± 74.10 | 93.86 ± 3.65  | 2804.45 ± 327.07 | 1556.55 ± 144.19 |
| 75                | (E)-β-Farnesene                | 18794-84-8 | 1440 | 26.96 ± 7.53   | ND            | ND               | ND               |
| 76                | Humulene epoxide II            | 19888-34-7 | 1592 | ND             | ND            | 104.82 ± 2.86    | 18.60 ± 2.69     |
| 77                | β-Sesquiphellandrene           | 20307-83-9 | 1446 | ND             | 3.55 ± 0.35   | 258.77 ± 5.51    | 170.05 ± 26.44   |
| 78                | α-Calacorene                   | 21391-99-1 | 1547 | 5.78 ± 1.80    | ND            | ND               | 9.57 ± 2.22      |
| 79                | Germacrene D                   | 23986-74-5 | 1515 | 99.71 ± 44.84  | 81.76 ± 8.97  | 269.22 ± 1.52    | 1259.32 ± 63.52  |
| 80                | α-Bisabolene                   | 29837-07-8 | 1518 | ND             | ND            | ND               | 40.61 ± 5.39     |
| 81                | γ-Elemene                      | 29873-99-2 | 1431 | ND             | 1.46 ± 0.07   | ND               | ND               |
| 82                | β-elemene                      | 33880-83-0 | 1398 | 11.10 ± 2.30   | 3.16 ± 1.03   | 97.57 ± 13.44    | 104.21 ± 40.85   |
| 83                | (+)-Sativene                   | 3650-28-0  | 1339 | ND             | 7.32 ± 2.17   | 160.53 ± 37.27   | ND               |
| 84                | α-Bulnesene                    | 3691-11-0  | 1490 | 4.66 ± 0.72    | ND            | ND               | 71.52 ± 29.85    |
| 85                | Fenchene                       | 471-84-1   | 943  | ND             | ND            | 134.79 ± 51.46   | ND               |



|                     |                                            |            |      |                      |                     |                       |                      |
|---------------------|--------------------------------------------|------------|------|----------------------|---------------------|-----------------------|----------------------|
| 86                  | $\alpha$ -Selinene                         | 473-13-2   | 985  | ND                   | $2.56 \pm 1.10$     | $53.39 \pm 3.40$      | ND                   |
| 87                  | $\Delta$ -Cadinene                         | 483-76-1   | 1469 | ND                   | ND                  | $470.66 \pm 88.54$    | $486.90 \pm 177.38$  |
| 88                  | L-calamenene                               | 483-77-2   | 1537 | $18.91 \pm 4.71$     | $26.19 \pm 5.64$    | $320.41 \pm 5.21$     | $335.59 \pm 32.35$   |
| 89                  | Aromandendrene                             | 489-39-4   | 1386 | $23.47 \pm 4.25$     | $15.53 \pm 4.69$    | $315.01 \pm 30.94$    | $381.88 \pm 30.14$   |
| 90                  | $\beta$ -Bisabolene                        | 495-61-4   | 1500 | $17.10 \pm 4.60$     | $14.27 \pm 0.93$    | $213.51 \pm 7.54$     | $400.75 \pm 99.31$   |
| 91                  | Pseudolimonene                             | 499-97-8   | 1013 | $12.93 \pm 2.57$     | $1.14 \pm 0.28$     | ND                    | ND                   |
| 92                  | $\gamma$ -Patchoulene                      | 508-55-4   | 1398 | ND                   | ND                  | $153.59 \pm 14.83$    | ND                   |
| 93                  | Terpinolene                                | 586-62-9   | 1052 | ND                   | ND                  | $61.68 \pm 1.02$      | $9.04 \pm 8.44$      |
| 94                  | D-Limonene                                 | 5989-27-5  | 1018 | $46.32 \pm 18.50$    | $17.89 \pm 0.71$    | ND                    | ND                   |
| 95                  | (-)-Aristolene                             | 6831-16-9  | 1403 | ND                   | $4.19 \pm 2.88$     | ND                    | ND                   |
| 96                  | (+)- $\alpha$ -pinene                      | 7785-70-8  | 948  | $1.85 \pm 0.20$      | ND                  | ND                    | ND                   |
| 97                  | $\gamma$ -Terpinene                        | 99-85-4    | 998  | ND                   | ND                  | $68.46 \pm 32.00$     | ND                   |
| <b>Hydrocarbons</b> |                                            |            |      |                      |                     |                       |                      |
| 98                  | 1-Pentadecene                              | 13360-61-7 | 1502 | ND                   | $8.27 \pm 1.09$     | $240.85 \pm 25.95$    | $247.45 \pm 67.37$   |
| 99                  | 1,3,8-p-Menthatriene                       | 18368-95-1 | 1029 | $0.87 \pm 0.01$      | ND                  | $19.99 \pm 0.66$      | ND                   |
| 100                 | 2-Methyl-5-oxo-1-cyclopenten-1-yl butyrate | 62338-57-2 | 1013 | ND                   | ND                  | ND                    | $8.31 \pm 4.60$      |
| 101                 | Dihydrosafrole                             | 94-58-6    | 1337 | ND                   | ND                  | $66.65 \pm 12.77$     | ND                   |
| 102                 | Hexadecane                                 | 544-76-3   | 1612 | $2.81 \pm 0.50$      | $1.50 \pm 0.24$     | $50.96 \pm 9.93$      | ND                   |
| 103                 | 2-Methyl-6-propyldodecane                  | 55045-08-4 | 1483 | ND                   | ND                  | ND                    | $6510.08 \pm 542.21$ |
| 104                 | Pentadecane                                | 629-62-9   | 1512 | $1367.34 \pm 337.47$ | $411.98 \pm 158.37$ | $12996.68 \pm 297.43$ | ND                   |
| 105                 | Heptadecane                                | 629-78-7   | 1711 | $21.68 \pm 5.54$     | $7.13 \pm 0.81$     | $443.81 \pm 55.16$    | $418.38 \pm 140.17$  |
| 106                 | 8-Hexadecyne                               | 19781-86-3 | 1629 | $6.86 \pm 1.42$      | ND                  | ND                    | ND                   |

Data are shown as means  $\pm$  standard deviation (n = 3).

ND means not detected

Table S7. Ordinal list of metabolites in S-plot

| No. | Compounds                       | No. | Compounds                       | No. | Compounds                           | No. | Compounds                          | No. | Compounds             | No. | Compounds    |
|-----|---------------------------------|-----|---------------------------------|-----|-------------------------------------|-----|------------------------------------|-----|-----------------------|-----|--------------|
| 1   | 4-Propylbenzoic acid            | 26  | 2,4-Undecadienol                | 51  | 1,4-Cineol                          | 76  | 9-Methyl-5-methylene-8-decen-2-one | 101 | $\beta$ -elemene      | 126 | 8-Hexadecyne |
| 2   | Hexadecanoic acid               | 27  | Linalool                        | 52  | Isoeugenyl methyl ether             | 77  | Dihydro- $\beta$ -ionone           | 102 | (+)-Sativene          | 127 | Asp          |
| 3   | Acetic acid p-tert-             | 28  | (E,E)-2,4-Hexadienal            | 53  | $\beta$ -Terpinylacetate            | 78  | 2-Pentadecanone                    | 103 | $\alpha$ -Bulnesene   | 128 | Glu          |
| 4   | Butylbenzoic acid               | 29  | (E,E)-2,4-Heptadienal           | 54  | Methyl cinnamate                    | 79  | Geranyl acetone                    | 104 | Fenchene              | 129 | Thr          |
| 5   | trans-Farnesol                  | 30  | Benzaldehyde                    | 55  | Cinnamyl acetate                    | 80  | 2-Bromo-3'-methoxyacetophenone     | 105 | $\alpha$ -Selinene    | 130 | Ser          |
| 6   | $\beta$ -Terpineol              | 31  | Benzenepropanal                 | 56  | Cinnamyl propionate                 | 81  | Eucarvone                          | 106 | $\Delta$ -Cadinene    | 131 | Gly          |
| 7   | D-Nerolidol                     | 32  | Neral                           | 57  | Crotonic acid, o-formylphenyl ester | 82  | Valencene                          | 107 | L-calamenene          | 132 | Ala          |
| 8   | cis-4-Thujanol                  | 33  | Anisaldehyde                    | 58  | Hexadecanoic acid, methyl ester     | 83  | $\alpha$ -Muurolen                 | 108 | Aromandendrene        | 133 | Lys          |
| 9   | $\alpha$ -muurolol (2Z,6Z)-2,6- | 34  | Tetradecanal                    | 59  | Linalyl formate                     | 84  | Cedrene                            | 109 | $\beta$ -Bisabolene   | 134 | Pro          |
| 10  | Dimethyl-2,6-octadiene-1,8-diol | 35  | 2-Methoxy cinnamaldehyde        | 60  | Benzenepropyl acetate               | 85  | Isocaryophyllene                   | 110 | Pseudolimonene        | 135 | Val          |
| 11  | Cubenol                         | 36  | $\alpha$ -Sinensal              | 61  | Nerol acetate                       | 86  | Isosafrole                         | 111 | $\gamma$ -Patchoulene | 136 | Met          |
| 12  | (Z)-9-Tetradecen-1-ol           | 37  | (E)-2-Undecenal                 | 62  | Ethyl p-methoxycinnamate            | 87  | $\beta$ -Myrcene                   | 112 | Terpinolene           | 137 | Ile          |
| 13  | (Z,E)-Farnesol                  | 38  | methyl coniferyl aldehyde       | 63  | Methyl 3-methoxybenzoate            | 88  | (E)- $\alpha$ -Bergamotene         | 113 | D-Limonene            | 138 | Leu          |
| 14  | Carotol                         | 39  | 2-Hydroxy-4-methoxybenzaldehyde | 64  | Decyl chloroformate                 | 89  | $\beta$ -Cubebene                  | 114 | (-)-Aristolene        | 139 | Tyr          |
| 15  | $\alpha$ -Cadinol               | 40  | Furfural                        | 65  | Cyclotene butyrate                  | 90  | $\beta$ -Ocimene                   | 115 | (+)- $\alpha$ -pinene | 140 | Phe          |

|    |                         |    |                                   |    |                                               |     |                             |     |                                            |     |                    |
|----|-------------------------|----|-----------------------------------|----|-----------------------------------------------|-----|-----------------------------|-----|--------------------------------------------|-----|--------------------|
| 16 | $\alpha$ -Bisabolol     | 41 | $\alpha$ -Durenol                 | 66 | 2,2,4-Trimethyl-1,3-pentenediol diisobutyrate | 91  | $\beta$ -Himachalene        | 116 | $\gamma$ -Terpinene                        | 141 | His                |
| 17 | Myrcenol                | 42 | Durenol                           | 67 | Methyl 15-methylhexadecanoate                 | 92  | $\alpha$ -Bergamotene       | 117 | 2-Methyl-5-oxo-1-cyclopenten-1-yl butyrate | 142 | Arg                |
| 18 | 3-Tetradecyn-1-ol       | 43 | 2-Methoxy-diphenylmethane         | 68 | Allyl thiocyanate                             | 93  | $\alpha$ -Cubebene          | 118 | Dihydrosafrole                             | 143 | (Cys) <sub>2</sub> |
| 19 | Viridiflorol            | 44 | 1-(2-Methoxyphenyl)-2-nitroethene | 69 | n-Propyl cinnamate                            | 94  | (E)- $\beta$ -Famesene      | 119 | $\beta$ -Methylisoallylbenzene             | 144 | Oxalic acid        |
| 20 | Terpinen-4-ol           | 45 | 1,2-Epoxyhexadecane               | 70 | $\alpha$ -Terpinyl acetate                    | 95  | Humulene epoxide II         | 120 | 1-Pentadecene                              | 145 | Tartaric acid      |
| 21 | $\gamma$ -Terpineol     | 46 | N-Methyl-1-naphthylamine          | 71 | Coumarin                                      | 96  | $\beta$ -Sesquiphellandrene | 121 | 1,3,8-p-Menthatriene                       | 146 | Malic acid         |
| 22 | Ocimenol                | 47 | p-Anisoyl chloride                | 72 | Eugenol acetate                               | 97  | $\alpha$ -Calacorene        | 122 | Hexadecane                                 | 147 | Lactic acid        |
| 23 | Linalool oxide          | 48 | 4-Acetoxy-1-decene                | 73 | 4-Acetylanisole                               | 98  | Germacrene D                | 123 | 2-Methyl-6-propyldodecane                  | 148 | Acetic acid        |
| 24 | Nerolidol               | 49 | Anethole                          | 74 | p-Methoxypropiophenone                        | 99  | $\alpha$ -Bisabolene        | 124 | Pentadecane                                | 149 | Citric acid        |
| 25 | (E)- $\beta$ -Terpineol | 50 | Nerol oxide                       | 75 | p-Acetonylanisole                             | 100 | $\gamma$ -Elemene           | 125 | Heptadecane                                | 150 | Succinic acid      |

Table S8 Differential metabolites between NF and BMF

|      | Compounds                           | No. <sup>a</sup> | VIP  |
|------|-------------------------------------|------------------|------|
| FAAs | Glu                                 | 128              | 1.59 |
|      | Phe                                 | 140              | 1.30 |
|      | Asp                                 | 127              | 1.28 |
|      | Pro                                 | 134              | 1.27 |
|      | Arg                                 | 142              | 1.23 |
|      | Ala                                 | 132              | 1.20 |
|      | Met                                 | 136              | 1.14 |
|      | Val                                 | 135              | 1.10 |
| OAs  | Lactic acid                         | 147              | 1.19 |
|      | Malic acid                          | 146              | 1.17 |
|      | Tartaric acid                       | 145              | 1.05 |
| VCs  | Terpinen-4-ol                       | 20               | 3.48 |
|      | $\alpha$ -Muurolen                  | 9                | 3.25 |
|      | n-Propyl cinnamate                  | 69               | 2.47 |
|      | 2-Methyl-6-propyldodecane           | 123              | 2.43 |
|      | (E)- $\beta$ -Terpineol             | 25               | 2.43 |
|      | Cinnamyl propionate                 | 56               | 2.25 |
|      | Linalool                            | 27               | 2.07 |
|      | Anethole                            | 49               | 1.99 |
|      | (Z,E)-Farnesol                      | 13               | 1.79 |
|      | $\beta$ -Himachalene                | 91               | 1.70 |
|      | D-Limonene                          | 113              | 1.67 |
|      | cis-4-Thujanol                      | 8                | 1.61 |
|      | Linalyl formate                     | 59               | 1.59 |
|      | $\alpha$ -Bergamotene               | 92               | 1.58 |
|      | Cinnamyl acetate                    | 55               | 1.54 |
|      | $\gamma$ -Terpineol                 | 21               | 1.45 |
|      | Acetic acid                         | 3                | 1.42 |
|      | Crotonic acid, o-formylphenyl ester | 57               | 1.09 |

|                    |     |      |
|--------------------|-----|------|
| $\delta$ -Cadinene | 106 | 1.06 |
| Valencene          | 82  | 1.02 |

a: The numbers are consistent with Table S7
